# Supplementary material for: Ability to Participate in Social Activities of Rheumatoid Arthritis Patients Compared with Other Rheumatic Diseases: A Cross-Sectional Observational Study
Source: MDPI journal article supplement (doi:10.3390/diagnostics11122258), 2021-12-02
Supplement: s1 [file s1]

Table S1: Clinical characteristics of 50 patients with SLE.

| Variable                                 | SLE (n=50)  |
|------------------------------------------|-------------|
| <i>Epidemiological characteristics</i>   |             |
| Sex (female), n (%)                      | 48 (96.0)   |
| Age, years, mean (SD)                    | 47.1 (11.3) |
| Time since diagnosis in years, mean (SD) | 18.1 (8.3)  |
| <i>Clinical manifestations</i>           |             |
| Malar rash, n (%)                        | 31 (62.0)   |
| Photosensitivity, n (%)                  | 38 (77.8)   |
| Ulcer, n (%)                             | 30 (60.3)   |
| Arthritis, n (%)                         | 24 (48.0)   |
| Serositis*, n (%)                        | 18 (36.1)   |
| Neurologic**, n (%)                      | 1 (2.0)     |
| Haemolytic***, n (%)                     | 16 (32.0)   |
| Nephritis, n (%)                         | 17 (33.3)   |
| Interstitial lung disease, n (%)         | 0 (0.0)     |

Abbreviations. SLE: systemic lupus erythematosus; *SD*, standard deviation; \*serositis: pleuritis and pericarditis; \*\*Neurologic: seizure and psychosis; \*\*\*Hematologic: haemolytic anaemia, leukopenia and thrombocytopenia
